# Supplementary material for: The impact of pathologic staging of the hilar/mediastinal nodes on outcomes in patients with early-stage NSCLC receiving stereotactic body radiotherapy
Source: PubMed Central journal article supplement — J Thorac Dis. 2021 Feb;13(2):1045–54. doi: 10.21037/jtd-20-2808 (PMC7947488; doi:10.21037/jtd-20-2808), 2021-02
Supplement: jtd-13-02-1045-dss.pdf [file jtd-13-02-1045-dss.pdf]

## Data Sharing Statement

|                     |                                                                                                                                                    |                                                                                                                  |
|---------------------|----------------------------------------------------------------------------------------------------------------------------------------------------|------------------------------------------------------------------------------------------------------------------|
| <b>Article Info</b> | <a href="http://dx.doi.org/10.21037/jtd-20-2808">http://dx.doi.org/10.21037/jtd-20-2808</a> .                                                      |                                                                                                                  |
| <b>Item</b>         | <b>Question</b>                                                                                                                                    | <b>Authors' Response<br/>(place "-" if not applicable)</b>                                                       |
| 1                   | Would you like to share data collected for your study to others?                                                                                   | If others are interested, then yes.                                                                              |
| 2                   | If not, would you like to share the reason for your decision?                                                                                      | -                                                                                                                |
| 3                   | What data in particular will be shared?                                                                                                            | The outcomes data in particular can be shared if requested.                                                      |
| 4                   | Any other documents will be share? Such as study protocol, statistical analysis plan, informed consent form, clinical study report, analytic code. | Informed consent form can also be shared if requested.                                                           |
| 5                   | When will data availability begin?                                                                                                                 | From the publication date.                                                                                       |
| 6                   | When will data availability end?                                                                                                                   | Two years within the publication date, since survival data may be updated over time.                             |
| 7                   | To whom will you share the data?                                                                                                                   | Radiation oncologists, medical oncologists and thoracic surgeons who are interested in the topic.                |
| 8                   | For what type of analysis or purpose?                                                                                                              | For analysis on evaluating SBRT outcomes in early-stage NSCLC.                                                   |
| 9                   | How or where can the data/documents be obtained?                                                                                                   | Emails can be sent to the corresponding author's email address to obtain the shared data as needed.              |
| 10                  | Any other restrictions?                                                                                                                            | We may balance the potential benefits and risks for each request and then provide the data that could be shared. |
